# Supplementary material
Source: PubMed Central journal article supplement (PMC5118601)
Supplement: thnov06p2367s1.pdf [file thnov06p2367s1.pdf]

## Supplementary Materials

### Photo-decomposable Organic Nanoparticles for Combined Tumor Optical Imaging and Multiple Phototherapies

*Wenjun Miao, Hyungjun Kim, Vipul Gujrati, Jin Yong Kim, Hyeongsu Jon, Yonghyun Lee, Minsuk Choi, Jinjoo Kim, Soyoung Lee, Dong Yun Lee, Sukmo Kang, and Sangyong Jon\**

\*To whom correspondence should be addressed:

E-mail: syjon@kaist.ac.kr

#### Table of Contents

1. Figure S1. Characterization of PEGylated cypate.
2. Figure S2. Effect of various ROS scavengers on intracellularly generated ROS by SP<sup>3</sup>NPs upon NIR laser irradiation.
3. Figure S3. Temperature change of cells treated with cypate and SP<sup>3</sup>NPs during NIR irradiation.
4. Figure S4. Assessment of cytotoxicity of NIR-decomposed fragments of SP<sup>3</sup>NPs.
5. Figure S5. Ev vivo fluorescence image of five vital organs excising from cypate- and SP<sup>3</sup>NPs-treated tumor-bearing mice
6. Figure S6. Digital photos of tumor-bearing mice after treatment with each regimen and NIR laser.

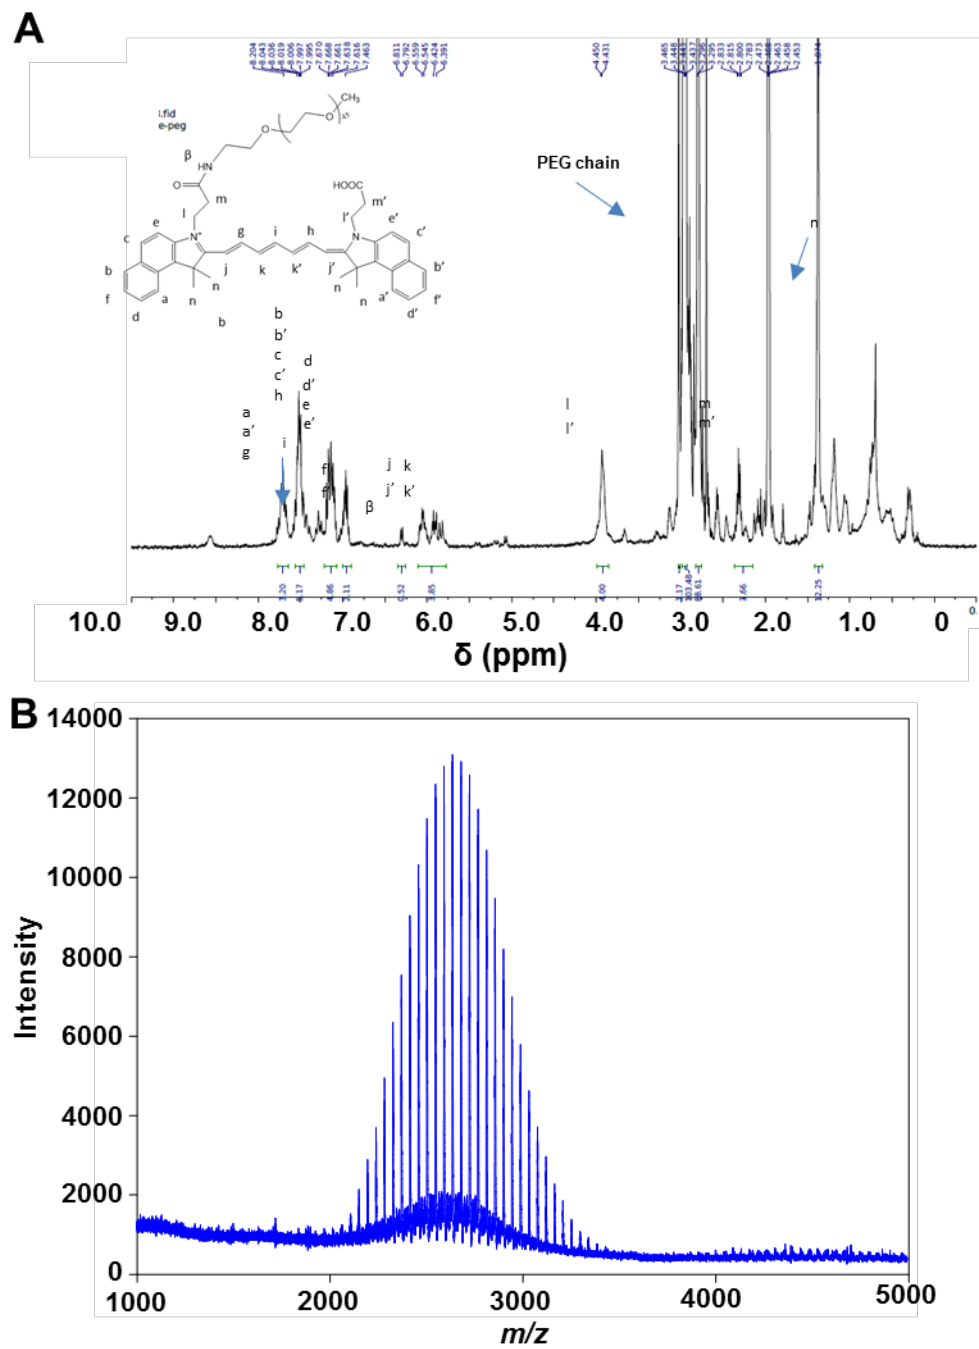

**Figure S1.** Characterization of PEGylated cybate by  $^1\text{H}$  NMR (A) and MALDI-TOF/MS (B).

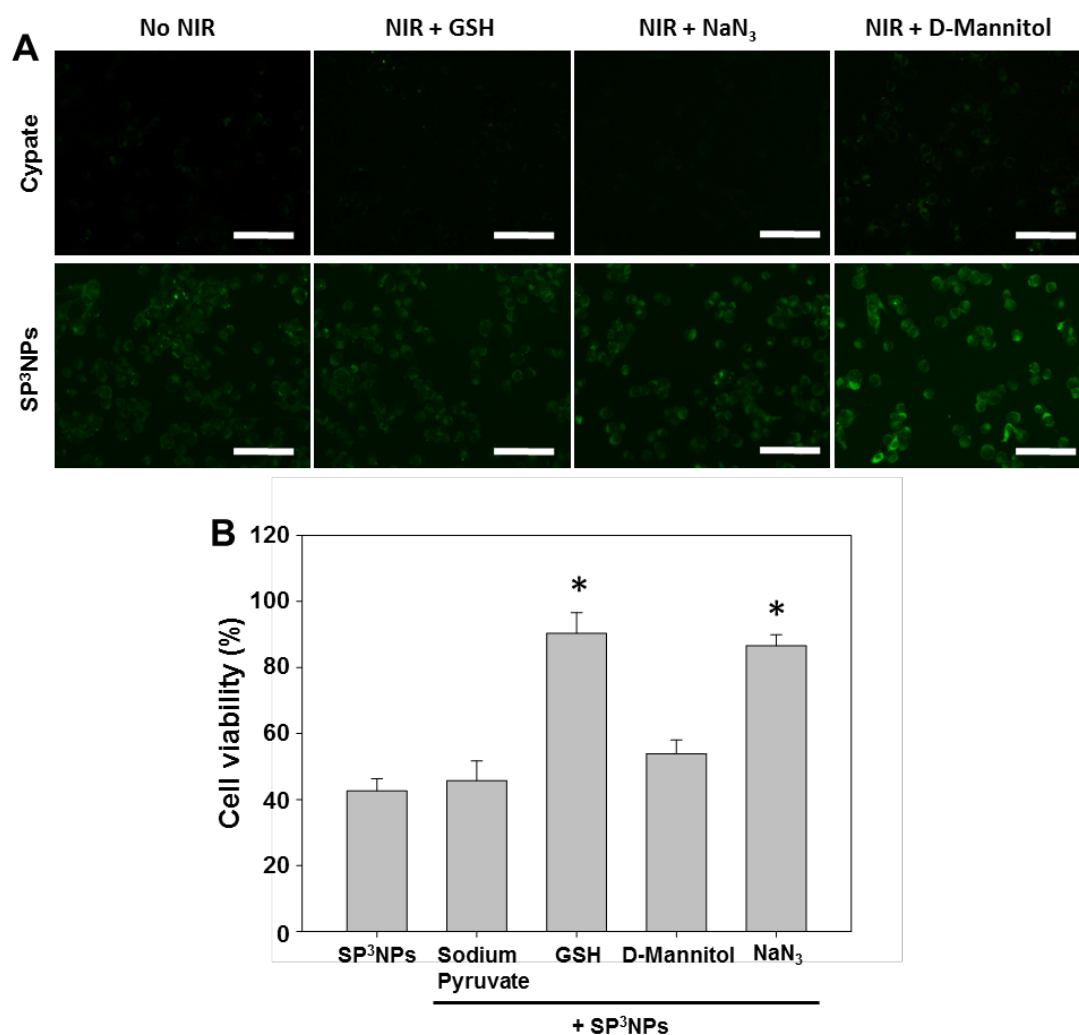

**Figure S2.** Effect of various ROS scavengers on intracellular generation of ROS by SP<sup>3</sup>NPs upon NIR laser irradiation. (A) Scavenging of intracellularly generated ROS by ROS scavengers. B16F10 cells were treated with free cypate or SP<sup>3</sup>NPs (equivalent to 5  $\mu\text{g ml}^{-1}$  cypate) for 1 h, and then incubated with fresh media containing various ROS scavengers (glutathione, sodium azide or D-mannitol, 100  $\mu\text{M}$  each) for 30 min. After NIR irradiation (808 nm, 0.8  $\text{W cm}^{-2}$ , 3 min), intracellular ROS was detected with H<sub>2</sub>DCFDA (10  $\mu\text{M}$ ) using fluorescence microscopy. Scale bar: 50  $\mu\text{m}$ . (B) Cytoprotective effects of ROS scavengers. B16F10 cells were treated with SP<sup>3</sup>NPs (100  $\mu\text{g ml}^{-1}$ ) for 1 h and further incubated with media containing ROS scavengers (sodium pyruvate, glutathione, sodium azide or D-mannitol, 100  $\mu\text{M}$ ) for 30 min. After NIR irradiation (808 nm, 0.8  $\text{W cm}^{-2}$ , 3 min), cells were incubated for 24 h, and MTT assays were conducted to assess cell viability. The results are expressed as means  $\pm$  s.e.m. of four independent experiments. \* $p < 0.05$  compared to other groups (ANOVA and Student-Newman-Keuls test).

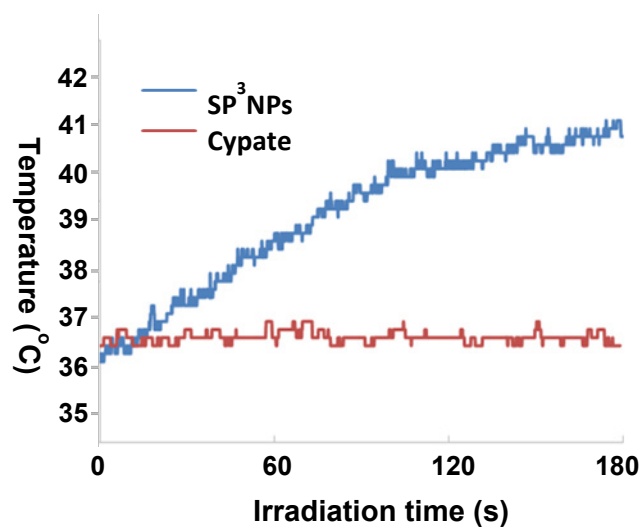

**Figure S3.** Temperature change of cells treated with cypate and SP<sup>3</sup>NPs during NIR irradiation. A 808-nm laser (0.8 W cm<sup>-2</sup>) was used to irradiate cypate or SP<sup>3</sup>NPs-treated B16F10 cells for 3 min. The temperature of cells were quantitated by FLIR system.

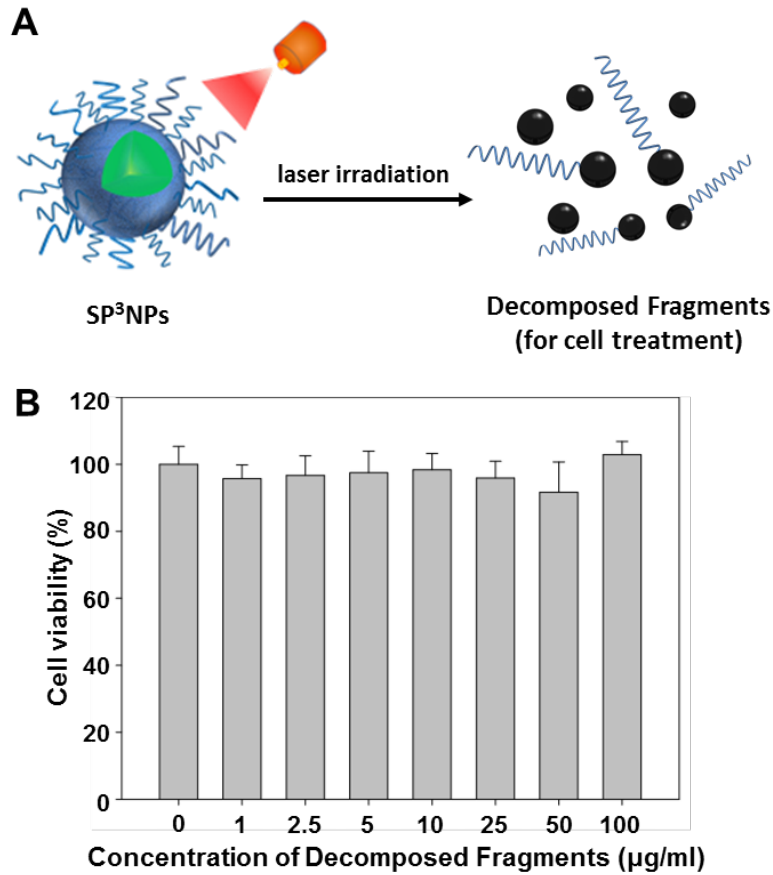

**Figure S4.** Assessment of cytotoxicity of NIR-degraded fragments of SP<sup>3</sup>NPs. (A) Schematic illustration of NIR laser-decomposed SP<sup>3</sup>NPs used to test the cytotoxicity of decomposed fragments. (B) Cytotoxicity of NIR-decomposed fragments of SP<sup>3</sup>NPs. SP<sup>3</sup>NPs were decomposed completely with a NIR laser (808 nm, 0.8 W cm<sup>-2</sup>), and the resulting colorless products were used to treat B16F10 cells for 24 h. Cell viability was quantified by MTT assay and expressed relative to that in the untreated control group. The results are expressed as means  $\pm$  s.e.m. of four independent experiments. No significant differences were found among groups.

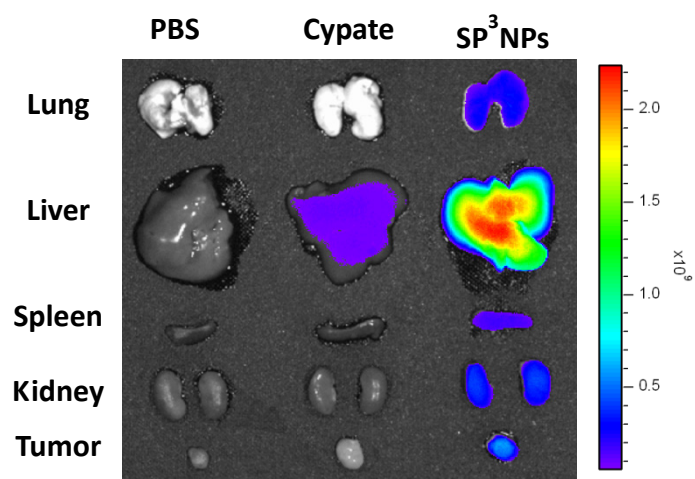

**Figure S5.** Ev vivo fluorescence image of five vital organs excising from cypate- and SP<sup>3</sup>NPs-treated tumor-bearing mice. The mice intravenously injected with PBS, free cypate or SP<sup>3</sup>NPs was sacrificed at 24 h post-dose, and the organs, including lung, liver, spleen, kidney and tumor were excised and fluorescence images were taken via Xenogen Lumina system.

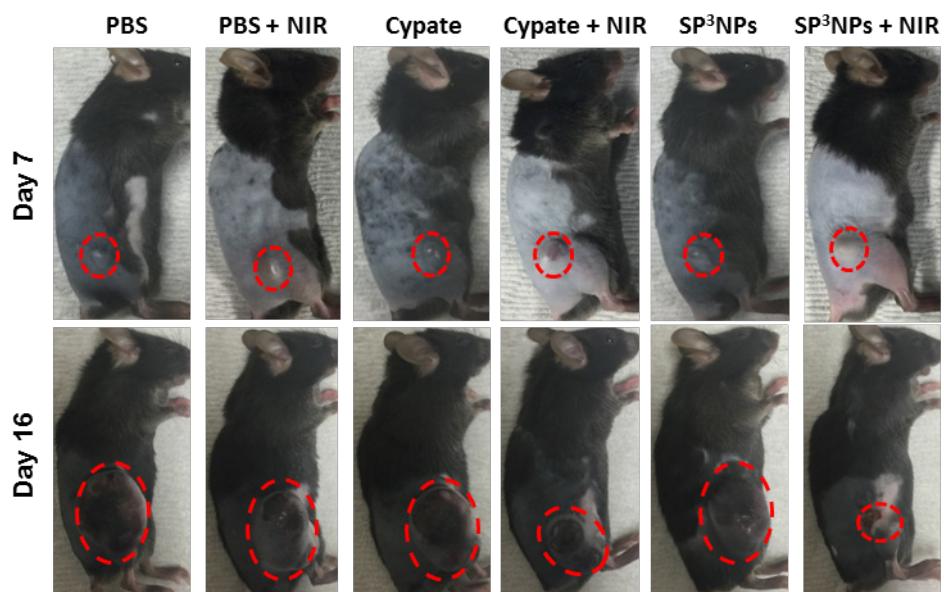

**Figure S6.** Digital photos of tumor-bearing mice after treatment with each regimen and NIR laser. On day 7, B16F10 tumor-bearing mice were administered a single intravenous dose of PBS, free cypate or SP<sup>3</sup>NPs at the same cypate dose (5 mg kg<sup>-1</sup>), followed by irradiation with a NIR laser (808 nm, 0.4 W cm<sup>-2</sup>, 10 min) at 4 h post-injection. The photos were taken on day 7 and day 16 after irradiation. Dashed red circles indicate tumor regions.
